# Supplementary material for: Aggregatibacter actinomycetemcomitans mediates protection of Porphyromonas gingivalis from Streptococcus sanguinis hydrogen peroxide production in multi-species biofilms
Source: PubMed Central journal article supplement (PMC6426879; doi:10.1038/s41598-019-41467-9), 2019-03-20
Supplement: 41598_2019_41467_MOESM1_ESM.pdf [file 41598_2019_41467_MOESM1_ESM.pdf]

*Aggregatibacter actinomycetemcomitans* mediates protection of *Porphyromonas gingivalis* from *Streptococcus sanguinis* hydrogen peroxide production in multi-species biofilms

Bin Zhu<sup>1</sup>, Lorna C Macleod<sup>1</sup>, Eric Newsome<sup>1</sup>, Jinlin Liu<sup>2</sup> and Ping Xu<sup>1,3,4,\*</sup>

Supporting information

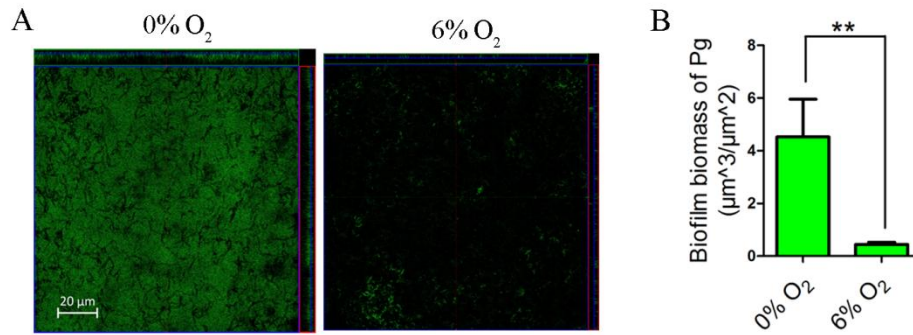

**Fig. S1** CLSM analysis of *Pg* biomass in FISH stained 4 day-old biofilms grown under anaerobic and micro-aerobic conditions. **(A)** Orthogonal images of *Pg* biofilm grown in 0% O<sub>2</sub> (left) and 6% O<sub>2</sub> (right). Scale bar shown on left image = 20 μm. **(B)** The fluorescent signal from images in Fig. S1A was quantified by COMSTAT analysis. \*\*P ≤ 0.01, Student's *t*-test. Means and standard deviations from triplicate experiments are shown.

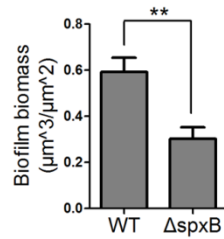

**Fig. S2** CLSM analysis of *Ss* biomass in 4-day old FISH stained biofilms under micro-aerobic conditions. The biomass of *Ss* in figure 2B was quantified by COMSTAT and shown as a bar chart. Scale bars were indicated on the corresponding images. \*\*P ≤ 0.01, Student's *t*-test. Means and standard deviations from triplicate experiments are shown.

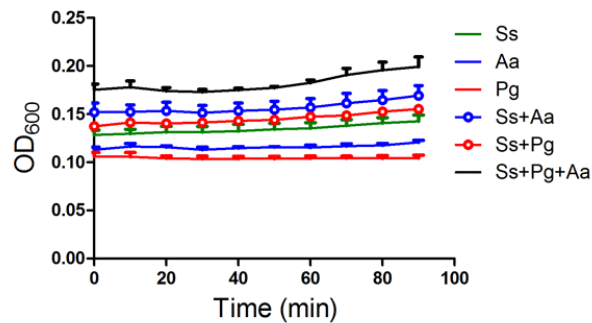

**Fig. S3 Cell density measurements recorded during H<sub>2</sub>O<sub>2</sub> concentrations time course experiment shown in Fig. 3B.** Cell densities were recorded at intervals of 10 minutes using a Synergy H1 Hybrid Reader (OD<sub>600</sub>).

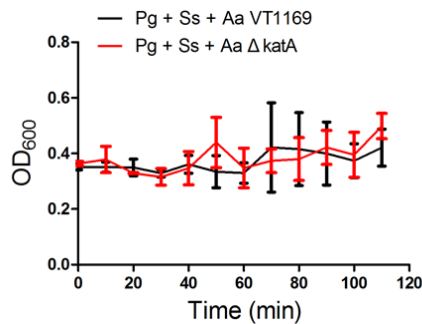

**Fig. S4 Cell density measurements recorded during H<sub>2</sub>O<sub>2</sub> concentrations time course experiment shown in Fig. 4A.** Cell densities were recorded at intervals of 10 minutes using the Synergy H1 Hybrid Reader (OD<sub>600</sub>).

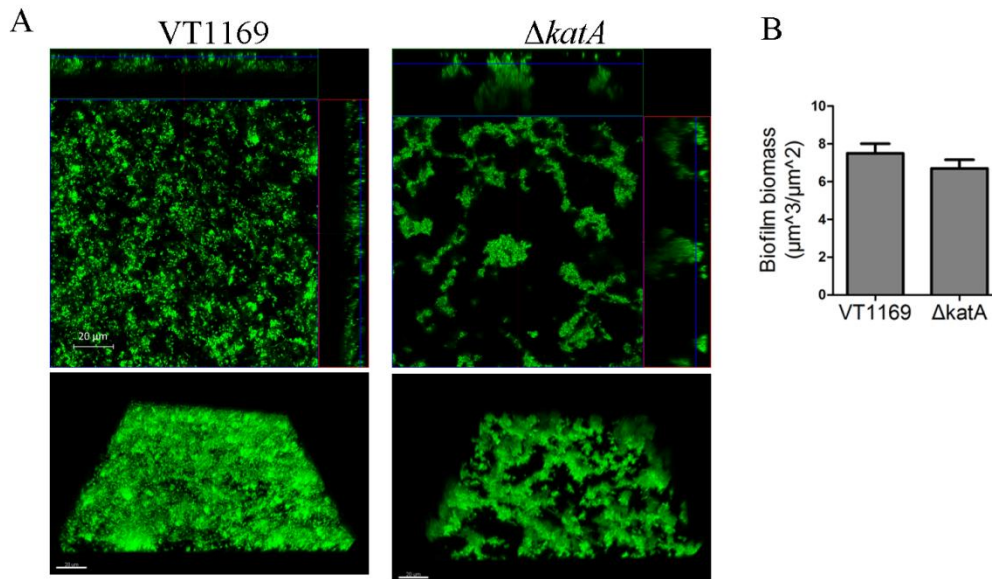

**Fig. S5 The biofilm formation of *Aa* ΔkatA.** *Aa* VT1169 WT and ΔkatA single species biofilms were cultured in CDM for 4 days, stained by STYO 9 and imaged by CLSM. The orthogonal images at the top and the 3D images at the bottom were shown (A) and biofilm biomass was quantified by COMSTAT (B). Student's *t*-test. Means and standard deviations from triplicate experiments are shown.

**Table S1 Strains used in this study.**

| Strain                                       | Genotype and/or relevant characteristics       | Source or reference |
|----------------------------------------------|------------------------------------------------|---------------------|
| <i>S. sanguinis</i> SK36                     | Wild type, Human plaque isolate                | 1                   |
| <i>P. gingivalis</i> ATCC 33277              | Wild type                                      | ATCC                |
| <i>A. actinomycetemcomitans</i> 652          | Wild type                                      | 2                   |
| <i>A. actinomycetemcomitans</i> VT1169       | Wild type                                      | 3                   |
| <i>A. actinomycetemcomitans</i> VT1169 ΔkatA | VT1169, katA deletion mutant, Spc <sup>R</sup> | 3                   |

**Table S2 FISH probes used in the study**

| Name    | Sequence (5'-3')                                 | Fluorescent dye | Application                                      |
|---------|--------------------------------------------------|-----------------|--------------------------------------------------|
| FISH-Ss | AGAGCAAGCTCCTCTCTTCAGCGTTC<br>TA/3' atto 488/    | ATTO 488        | FISH staining of <i>S. sanguinis</i>             |
| FISH-Aa | AGTACAAGTACTTACCTGCTACCGTC<br>CGA/3' atto 590/   | ATTO 590        | FISH staining of <i>A. actinomycetemcomitans</i> |
| FISH-Pg | ACCTTAGCAAGCTAAGATCATGCTG<br>CCCCT/3' atto 647N/ | ATTO 647N       | FISH staining of <i>P. gingivalis</i>            |

- 1 Kilian, M. & Holmgren, K. Ecology and nature of immunoglobulin A1 protease-producing streptococci in the human oral cavity and pharynx. *Infection and immunity* **31**, 868-873 (1981).
- 2 Brogan, J. M., Lally, E. T., Poulsen, K., Kilian, M. & Demuth, D. R. Regulation of *Actinobacillus actinomycetemcomitans* leukotoxin expression: analysis of the promoter regions of leukotoxic and minimally leukotoxic strains. *Infection and immunity* **62**, 501-508 (1994).
- 3 Ramsey, M. M. & Whiteley, M. Polymicrobial interactions stimulate resistance to host innate immunity through metabolite perception. *Proceedings of the National Academy of Sciences of the United States of America* **106**, 1578-1583, doi:10.1073/pnas.0809533106 (2009).
